# Supplementary material for: DNA Methylation Restricts Lineage-specific Functions of Transcription Factor Gata4 during Embryonic Stem Cell Differentiation
Source: PLoS Genet. 2013 Jun 27;9(6):e1003574. doi: 10.1371/journal.pgen.1003574 (PMC3694845; doi:10.1371/journal.pgen.1003574)
Supplement: Table S3 — The List of Gata4 hyper-responsive genes at 24 hr in Dnmt3a/Dnmt3b-deficient mesoderm cells, as categorized in Figure 3A. (XLS) [file pgen.1003574.s015.xls]

## Sheet: TableS3
Table S3. List of Gata4 hyper-responsive genes at 24h in Dnmt3a-/-Dnmt3b-/- mesoderm cells, described in Figure 3
Gene name	Group 1/2
Nrg2	Group 1
Elf3	Group 1
Gm7325	Group 1
Fbxo15	Group 1
Spink3	Group 1
Clgn	Group 1
Folr1	Group 1
Sox17	Group 1
Elovl7	Group 1
Mertk	Group 1
Srgn	Group 1
Marveld2	Group 1
Tcfe3	Group 1
Tbc1d24	Group 1
Plekhf1	Group 1
Foxa2	Group 1
Fabp3	Group 1
Lrpap1	Group 1
Cldn7	Group 1
Sord	Group 1
Myo5b	Group 1
Il33	Group 1
Pla2g12b	Group 1
Aqp8	Group 1
Foxq1	Group 1
BC021614	Group 1
D14Ertd668e	Group 1
Gsta3	Group 1
Nxnl2	Group 1
Pmaip1	Group 1
Btn2a2	Group 1
Osta	Group 1
Cldn3	Group 1
Ptk2b	Group 1
Bik	Group 1
Ttn	Group 1
Plcb4	Group 1
Ccdc19	Group 1
Clic5	Group 1
Foxo3	Group 1
Rnf43	Group 1
2010003K15Rik	Group 1
Usp2	Group 1
Tom1l1	Group 1
Itfg3	Group 1
Ltk	Group 1
5730469M10Rik	Group 1
Zp1	Group 1
Gstm2	Group 1
Adprhl1	Group 1
Dock5	Group 1
Fcer1g	Group 1
Pdpn	Group 1
Akr1b8	Group 1
Cited4	Group 2
Tfpi2	Group 2
Slc13a4	Group 2
Mrap	Group 2
1190002H23Rik	Group 2
S1pr5	Group 2
Aldh1a3	Group 2
Thbs4	Group 2
1700016F12Rik	Group 2
Sh2d4a	Group 2
Fhod3	Group 2
Adora3	Group 2
Lrrc10	Group 2
Ccdc141	Group 2
Ano4	Group 2
Fam5c	Group 2
Myl4	Group 2
Pnoc	Group 2
6030498E09Rik	Group 2
Ank3	Group 2
Csrp3	Group 2
Rgs17	Group 2
Nkx2-5	Group 2
Tek	Group 2
Tnnt2	Group 2
Fras1	Group 2
Ptprb	Group 2
Mybph	Group 2
Lbh	Group 2
Vcam1	Group 2
Ak3	Group 2
Myocd	Group 2
Gyg	Group 2
Apba1	Group 2
Tbx18	Group 2
Procr	Group 2
Aldh1a1	Group 2
Mybpc3	Group 2
Spnb1	Group 2
Leprel4	Group 2
